# Supplementary material for: Proteomic profile of the hard corona of charged polystyrene nanoparticles exposed to sea urchin Paracentrotus lividus coelomic fluid highlights potential drivers of toxicity
Source: Royal Society of Chemistry journal article supplement (doi:10.1039/c9en00824a), 2019-01-01
Supplement: c9en00824a1.pdf [file c9en00824a1.pdf]

## Supporting information

### **Proteomic profile of hard corona of charged polystyrene nanoparticles exposed to sea urchin *Paracentrotus lividus* coelomic fluid highlights potential drivers of toxicity**

Giacomo Grassi<sup>a\*</sup>, Claudia Landi<sup>b</sup>, Camilla della Torre<sup>c</sup>, Elisa Bergami<sup>a</sup>, Luca Bini<sup>b</sup> and Ilaria Corsi<sup>a</sup>.

<sup>a</sup>Department of Physical, Earth and Environmental Sciences, University of Siena, 53100 Siena, Italy

<sup>b</sup>Department of Life Sciences, University of Siena, 53100 Siena, Italy

<sup>c</sup>Department of Life Sciences, University of Milan, 20133 Milan, Italy

\*Corresponding author, Phone: +39 0577 232811; email: [grassi23@student.unisi.it](mailto:grassi23@student.unisi.it)

Number of pages: 8

Number of tables: 2

Number of figures: 1

Table of contents:

|                                                    |    |
|----------------------------------------------------|----|
| Table S1.....                                      | S2 |
| Additional description of methods.....             | S2 |
| Polystyrene NPs characterization.....              | S2 |
| Preparation and desorption of protein coronas..... | S2 |
| Proteomic analysis.....                            | S3 |
| Protein Identification by Mass Spectrometry.....   | S4 |
| Figure S1.....                                     | S6 |
| Table S2.....                                      | S7 |
| Table S3.....                                      | S8 |
| References.....                                    | S9 |

**Table S1.** Chemical parameters including heavy metals (Cr, As, Cd, Hg, Pb) of natural sea water samples used in the study for the maintenance of *P. lividus* organism in aquaria and for PS NPs characterization. Data also available free of charge at: SIRA RSS. [www.sira.arpat.toscana.it/](http://www.sira.arpat.toscana.it/).

| Parameter                |               |
|--------------------------|---------------|
| Total Oxygen             | 8.08 mg/L     |
| N <sub>TOT</sub>         | 0.0406 mg/L   |
| P <sub>TOT</sub>         | < 0.0124 mg/L |
| Salinity                 | 38‰           |
| Cr <sub>TOT</sub>        | < 1 µg/L      |
| Cr <sub>VI</sub>         | < 0.5 µg/L    |
| As                       | 1.3 µg/L      |
| Ni                       | < 1 µg/L      |
| Cd                       | < 0.05 µg/L   |
| Hg                       | < 0.01 µg/L   |
| Pb                       | < 1 µg/L      |
| Hydrocarbons (C10 – C40) | < 100 µg/L    |

### Additional description of methods

**Polystyrene NPs characterization.** CF was thawed, centrifuged for 5 min at 16000×g to eliminate possible protein aggregates and used for PS-NH<sub>2</sub> and PS-COOH dispersions, at a concentration of 25 µg mL<sup>-1</sup>. Dispersion parameters were analyzed by dynamic light scattering (DLS), on a Malvern Zetasizer ZS (Malvern Instruments, Worcestershire, UK), with a 633 nm laser beam and a backscattering angle of 90°. NPs size distribution, mean hydrodynamic diameter (Z-average) and polydispersity index (PdI) were obtained at 18°C, with three independent measurements, each consisting of 11 sub-runs. The zeta potential values were acquired as triplicate measurements, each consisting of several runs, the number of which was determined instrumentally (max. 100 runs) until a reliable measurement was obtained. The influence of CF on PS NPs surface charge was investigated by measuring the ζ-potential through electrophoretic light scattering. The contribution of proteins or protein aggregates present in CF was negligible and did not affect light scattering measurements.

**Preparation and desorption of protein coronas.** The native protein concentration of coelomic fluid was in the range of 300 to 500 µg mL<sup>-1</sup>. Therefore, CF had to be additionally processed prior

PS-NPs incubations. Briefly, the CF was thawed and transferred to Amicon Ultra-15 (Millipore) centrifugal filter units with a 3 kDa MWCO regenerated cellulose membranes and centrifuged at  $3500\times g$ ,  $4^{\circ}\text{C}$ , until the desired volume was achieved ( $5\text{ mg mL}^{-1}$  average protein content). The concentrated CF was centrifuged at  $16000\times g$ , for 10 min at  $4^{\circ}\text{C}$  to remove possible protein aggregates, if any, before incubation with PS-NH<sub>2</sub> and PS-COOH NPs. Following incubation the protein-particle complexes were washed three times by centrifugation at  $18000\times g$ , at  $18^{\circ}\text{C}$  for 15 min and resuspension in PBS. NP-corona pellet was recovered and hardly retained proteins were eluted from the washed NP-corona complexes with a methanol/chloroform precipitation procedure<sup>1,2</sup>, with minor modifications. Initially, 400  $\mu\text{L}$  of methanol were added to the washed NPs-corona pellet, which was fully resuspended by a brief pulse (5 s) of bath sonication. The PS NPs were then dissolved with the addition of 200  $\mu\text{L}$  of chloroform followed by 5 s of bath sonication, thus breaking down the core polymeric structure of NPs and releasing proteins from the NP surface, maximizing the yield. The desorbed proteins were precipitated by the addition of 300  $\mu\text{L}$  of demineralized water and centrifugation at  $9000\times g$  for 1 min. A triphasic system was formed and the corona proteins, located at the interface, were recovered by removing the upper water-methanol layer and pelleted by addition of 400  $\mu\text{L}$  of methanol, vigorous vortexing and centrifugation at  $12000\times g$  for 5 min. The obtained pellet was air-dried for 10 min and rehydrated in 150  $\mu\text{L}$  of Bio-Rad Protein Solubilization Buffer (urea, thiourea, CHAPS and NDSB-201), supplemented with 1% DTT as a reducing agent. Finally, the samples were quantitated with 2-D QuantKit® (GE healthcare) for total protein concentration and diluted, when necessary, to  $6\text{ }\mu\text{g }\mu\text{L}^{-1}$ , prior adding 2% (v/v) carrier ampholytes (pH 3-10).

**Proteomic analysis.** Isoelectric focusing (IEF) was carried out on nonlinear wide-range immobilized pH gradients (pH 3.0–10; 18 cm long IPG strips; GE Healthcare, Uppsala, Sweden) and achieved using an EttanIPGphor™ system (GE Healthcare). Six hundred micrograms of total protein were loaded by rehydration loading, overnight at 30 V. After rehydration step, first dimensional run was carried out at  $16^{\circ}\text{C}$  under the following electrical conditions: 200 V for 8 h, a gradient until 3500 V for 2 h, a step of 3500 V for other 2 h. After that, a gradient until 5000V for 2 h is applied and maintained 5000 V for other 3 h, another gradient until 8000 V for 1 h and a step of 8000 V for 3 h. At the end a gradient until 10000 V for 1 h is performed and maintained for a total of 100,000 Vh. After the first dimensional run, the IPG gels were equilibrated in 6 M urea, 2 % w/v SDS, 2 % w/v DTE, 3 0% v/v glycerol and 0.05 M Tris-HCl pH 6.8 for 12 min and for a further 5 min in the same solution where DTE was replaced by 2.5 % w/v iodoacetamide and a trace of bromophenol blue. After the two equilibration steps, second dimensional separation was carried out at  $15^{\circ}\text{C}$  on 9-16 % home-made polyacrylamide linear gradient gels ( $18 \times 20\text{ cm} \times 1.5\text{ mm}$ ) at 17

W/gel using an EttanDalt II system (GE Healthcare). Runs were performed until the dye front reached the bottom of the gel. MS-preparatory gels were stained with SYPRO Ruby (Bio-rad headquarters, Hercules, California) according to the manufacturer's instructions. Bind-silane ( $\gamma$ -methacryloxypropyltrimethoxysilane) (LKBProdukter AB, Brommo, Sweden) was used to attach polyacrylamide gels covalently to a glass surface. Preparative gel images stained with SYPRO Ruby were digitized with a Typhoon 9400 laser densitometer (GE Healthcare). Computer-aided 2D image was carried out with the Image Master Platinum 7.0 computer system (GE Healthcare). The significant variations of proteins were investigated by comparing gels from CF and PS-NH<sub>2</sub> and PS-COOH corona. Spots corresponding to differentially abundant proteins were statistically evaluated in terms of the mean relative volume (vol. %) using Student's t-test for unpaired samples. The significance level was defined as  $p < 0.05$ . A minimum 2-folds change cut-off relative to different samples was employed as a further criterion for differential abundance.

**Protein Identification by Mass Spectrometry.** In order to perform protein identification of the principal spots present in the gels, the well visible spots were selected by a landmark and mechanically excised from the gel. Protein identification was carried out by peptide mass fingerprinting (PMF) on an ultrafleXtreme™ MALDI-ToF/ToF instrument (Bruker Corporation, Billerica, MA, United States). After visualization using a SYPRO Ruby staining protocol, all the spots of interest were mechanically excised with an Ettan Spot Picker (GE Healthcare), destained in 2.5 mM ammonium bicarbonate and 50% acetonitrile and finally, dehydrated in acetonitrile. They were then re-hydrated in trypsin solution and an in-gel protein digestion was performed overnight with incubation at 37°C. Each protein digest (0.75  $\mu$ l) was spotted onto a MALDI target and allowed to air dry. Then 0.75  $\mu$ l of matrix solution (saturated solution of  $\alpha$ -cyano-4-hydroxycinnamic acid in 50 % (v/v) acetonitrile and 0.5 % (v/v) TFA) was applied to the sample and dried again. MS analysis was then performed with UltrafleXtreme™ MALDI-ToF/ToF instrument (Bruker Corporation, Billerica, MA, United States) equipped with a 200 Hz smartbeam™ I laser in the positive reflector mode according to defined parameters: 80 ns of delay; ion source 1: 25 kV; ion source 2: 21.75 kV; lens voltage: 9.50 kV; reflector voltage: 26.30 kV; and reflector 2 voltage: 14.00 kV. The applied laser wavelength and frequency were 353 nm and 100 Hz, respectively, and the percentage was set to 46%. Final mass spectra were produced by averaging 1500 laser shots targeting five different position within the spot. Spectra were acquired automatically and the Flex Analysis software version 3.0 (Bruker) was used for their analysis and for the assignment of the peaks. The applied software generated a list of peaks up to 200, using a signal-to-noise ratio of 3 as threshold for peak acceptance. Recorded spectra were calibrated using

peptides arising from trypsin autolysis as internal standard. The resulting mass lists were filtered for contaminant removal: mass matrix-related ions, trypsin auto-lysis and keratin peaks. PMF searches were carried out against the NCBIprot/SwissProt databases using MASCOT search engine available on-line (Matrix Science Ltd, London, UK, <http://www.matrixscience.com>). Taxonomy was limited to Metazoa, a mass tolerance of 100 ppm was allowed and the number of accepted missed cleavage sites was set at one. Alkylation of cysteine by carbamidomethylation was considered as a fixed modification, while oxidation of methionine was considered as a variable modification. The criteria used to accept identifications included the extent of sequence coverage, the number of matched peptides and the MASCOT algorithm assigned a probabilistic score ( $> 80$  or  $p < 0.001$ ).

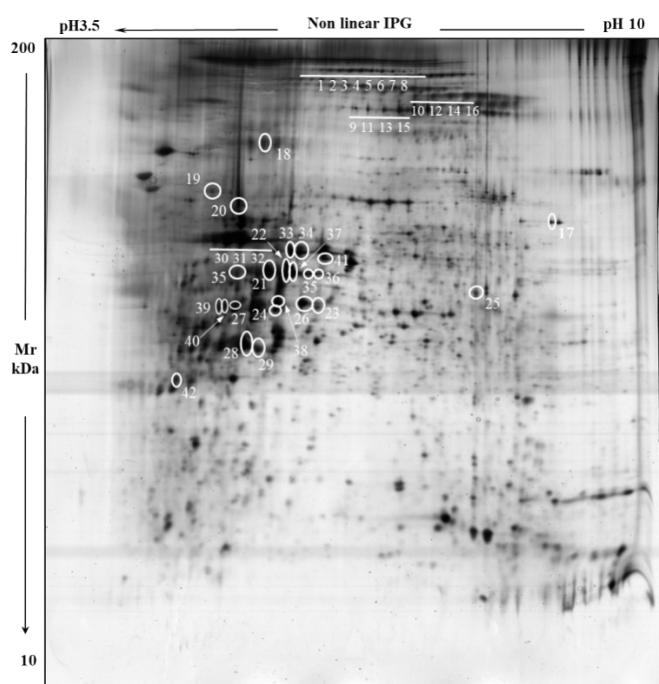

*Hard corona from nanoparticles NH<sub>2</sub> modified*

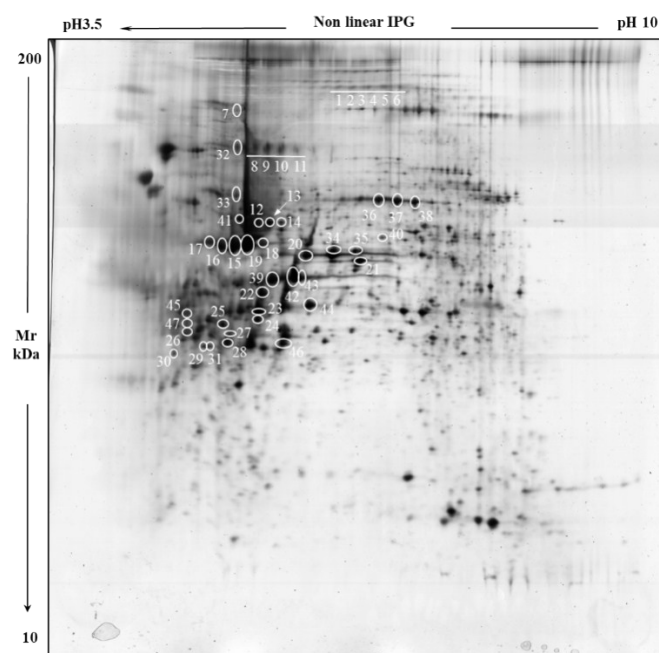

*Hard corona from nanoparticles COOH modified*

**Figure S1.** 2DE gels of protein coronas from PS-NH<sub>2</sub> (upper panel) and PS-COOH (lower panel) NPs. Spots circled and numbered have been excised for tryptic digestion and MALDI-TOF identification.

**Table S2.** List of identified proteins from PS-COOH NPs hard corona

| Spot number | Name                    | Accession number   | Species                       | pI MW       | Mascot Search Results |          |                  |
|-------------|-------------------------|--------------------|-------------------------------|-------------|-----------------------|----------|------------------|
|             |                         |                    |                               |             | Score                 | Coverage | Matched peptides |
| 1           | Toposome                | AAQ17121.1         | Paracentrotus lividus         | 6.15 155336 | 111                   | 10       | 14               |
| 2           | Toposome                | AAQ17121.2         | Paracentrotus lividus         | 6.15 155337 | 147                   | 9        | 13               |
| 3           | Toposome                | AAQ17121.1         | Paracentrotus lividus         | 6.15 155336 | 103                   | 9        | 11               |
| 4           | Toposome                | AAQ17121.1         | Paracentrotus lividus         | 6.15 155336 | 114                   | 12       | 18               |
| 5           | Toposome                | AAQ17121.1         | Paracentrotus lividus         | 6.15 155336 | 108                   | 13       | 18               |
| 6           | Toposome                | AAQ17121.1         | Paracentrotus lividus         | 6.15 155337 | 111                   | 10       | 10               |
| 7           | Nectin Precursor        | CAE17512.2         | Paracentrotus lividus         | 6.02 108817 | 134                   | 21       | 14               |
| 8           | Actin, cytoskeletal 2A  | Q07903             | Strongylocentrotus purpuratus | 5.29 42059  | 120                   | 40       | 12               |
| 9           | Actin, cytoskeletal 2B  | P69005             | Strongylocentrotus purpuratus | 5.29 42056  | 112                   | 39       | 11               |
| 10          | Actin, cytoskeletal 2B  | P69005             | Strongylocentrotus purpuratus | 5.29 42056  | 113                   | 39       | 12               |
| 11          | actin, cytoskeletal 2B  | NP_999693.1        | Strongylocentrotus purpuratus | 5.29 42057  | 138                   | 35       | 12               |
| 12          | actin, cytoskeletal 2B  | NP_999693.1        | Strongylocentrotus purpuratus | 5.29 42057  | 103                   | 39       | 12               |
| 13          | actin, cytoskeletal 2B  | NP_999693.1        | Strongylocentrotus purpuratus | 5.29 42057  | 161                   | 48       | 16               |
| 14          | actin, cytoskeletal 2B  | NP_999693.1        | Strongylocentrotus purpuratus | 5.29 42057  | 168                   | 40       | 14               |
| 15          | actin, cytoskeletal 2B  | NP_999693.1        | Strongylocentrotus purpuratus | 5.29 42057  | 216                   | 50       | 21               |
| 16          | actin, cytoskeletal 2B  | NP_999693.1        | Strongylocentrotus purpuratus | 5.29 42057  | 178                   | 44       | 16               |
| 17          | actin, cytoskeletal 2B  | NP_999693.1        | Strongylocentrotus purpuratus | 5.29 42057  | 123                   | 28       | 11               |
| 18          | actin, cytoskeletal 2B  | NP_999693.1        | Strongylocentrotus purpuratus | 5.29 42057  | 179                   | 41       | 15               |
| 19          | actin, cytoskeletal 2B  | NP_999693.1        | Strongylocentrotus purpuratus | 5.29 42057  | 185                   | 44       | 18               |
| 20          | actin, cytoskeletal 2B  | NP_999693.1        | Strongylocentrotus purpuratus | 5.29 42057  | 107                   | 35       | 13               |
| 21          | actin, cytoskeletal 2B  | NP_999693.1        | Strongylocentrotus purpuratus | 5.29 42057  | 171                   | 42       | 17               |
| 22          | actin, cytoskeletal 2B  | NP_999693.1        | Strongylocentrotus purpuratus | 5.29 42057  | 138                   | 38       | 11               |
| 23          | actin, cytoskeletal 2B  | NP_999693.1        | Strongylocentrotus purpuratus | 5.29 42057  | 153                   | 41       | 12               |
| 24          | actin, cytoskeletal 2B  | NP_999693.1        | Strongylocentrotus purpuratus | 5.29 42057  | 138                   | 35       | 12               |
| 25          | actin, cytoskeletal 2B  | NP_999693.1        | Strongylocentrotus purpuratus | 5.29 42057  | 119                   | 35       | 10               |
| 26          | actin, cytoskeletal 2B  | NP_999693.1        | Strongylocentrotus purpuratus | 5.29 42057  | 97                    | 37       | 9                |
| 27          | actin, cytoskeletal 2B  | NP_999693.1        | Strongylocentrotus purpuratus | 5.29 42057  | 159                   | 45       | 16               |
| 28          | actin, cytoskeletal 2B  | NP_999693.1        | Strongylocentrotus purpuratus | 5.29 42057  | 123                   | 34       | 11               |
| 29          | actin, cytoskeletal 2B  | NP_999693.1        | Strongylocentrotus purpuratus | 5.29 42057  | 107                   | 37       | 10               |
| 30          | actin, cytoskeletal 2B  | NP_999693.1        | Strongylocentrotus purpuratus | 5.29 42057  | 87                    | 31       | 8                |
| 31          | actin, cytoskeletal 2B  | NP_999693.1        | Strongylocentrotus purpuratus | 5.29 42057  | 96                    | 31       | 8                |
| 32          | actin, cytoskeletal 3B  | NP_999692.1        | Strongylocentrotus purpuratus | 5.22 42147  | 90                    | 33       | 9                |
| 33          | actin, cytoskeletal 3B  | NP_999692.1        | Strongylocentrotus purpuratus | 5.22 42147  | 110                   | 22       | 8                |
| 34          | actin, cytoskeletal 3B  | XP_003725373       | Strongylocentrotus purpuratus | 5.2242062   | 153                   | 41       | 15               |
|             | actin, cytoskeletal 2B  | NP_999693.1        | Strongylocentrotus purpuratus | 5.29 42057  | 153                   | 41       | 15               |
|             | actin, cytoskeletal 3B  | XP_003725373       | Strongylocentrotus purpuratus | 5.2242062   | 205                   | 54       | 20               |
| 35          | actin, cytoskeletal 2B  | NP_999693.1        | Strongylocentrotus purpuratus | 5.29 42057  | 205                   | 54       | 20               |
| 36          | fascin                  | NP_999701.1        | Strongylocentrotus purpuratus | 5.46 55537  | 109                   | 18       | 11               |
| 37          | fascin                  | NP_999701.1/Q05634 | Strongylocentrotus purpuratus | 5.46 55537  | 118                   | 21       | 11               |
| 38          | fascin                  | NP_999701.1        | Strongylocentrotus purpuratus | 5.46 55537  | 102                   | 15       | 9                |
| 39          | actin-15B               | XP_001176242.1     | Strongylocentrotus purpuratus | 5.29 42059  | 91                    | 42       | 11               |
| 40          | actin-15B               | XP_001176242.1     | Strongylocentrotus purpuratus | 5.29 42059  | 106                   | 30       | 8                |
| 41          | actin-15B               | XP_001176242.1     | Strongylocentrotus purpuratus | 5.29 42059  | 131                   | 37       | 10               |
| 42          | actin-15B               | XP_001176242.1     | Strongylocentrotus purpuratus | 5.29 42059  | 153                   | 40       | 12               |
| 43          | actin-15B               | XP_001176242.1     | Strongylocentrotus purpuratus | 5.29 42059  | 106                   | 33       | 9                |
| 44          | actin-15B               | XP_001176242.1     | Strongylocentrotus purpuratus | 5.29 42059  | 89                    | 33       | 8                |
| 45          | actin-15B               | XP_001176242.1     | Strongylocentrotus purpuratus | 5.29 42059  | 108                   | 28       | 7                |
| 46          | actin-15B               | XP_001176242.1     | Strongylocentrotus purpuratus | 5.29 42059  | 118                   | 30       | 10               |
| 47          | Muscle actin isoform X1 | XP_011661664.1     | Strongylocentrotus purpuratus | 5.30 42077  | 92                    | 33       | 8                |

**Table S3.** Table of identified proteins from PS-NH<sub>2</sub> NPs hard coronas

| Spot number | Name                                            | Accession number | Species                       | pI/ MW      | Mascot Search Results |          |                  |
|-------------|-------------------------------------------------|------------------|-------------------------------|-------------|-----------------------|----------|------------------|
|             |                                                 |                  |                               |             | Score                 | Coverage | Matched peptides |
| 1           | Toposome                                        | AAQ17121.1       | Paracentrotus lividus         | 6.15 155336 | 194                   | 13       | 17               |
| 2           | Toposome                                        | AAQ17121.2       | Paracentrotus lividus         | 6.15 155337 | 96                    | 7        | 10               |
| 3           | Toposome                                        | AAQ17121.1       | Paracentrotus lividus         | 6.15 155336 | 163                   | 12       | 16               |
| 4           | Toposome                                        | AAQ17121.1       | Paracentrotus lividus         | 6.15 155336 | 205                   | 16       | 21               |
| 5           | Toposome                                        | AAQ17121.1       | Paracentrotus lividus         | 6.15 155336 | 114                   | 8        | 11               |
| 6           | Toposome                                        | AAQ17121.1       | Paracentrotus lividus         | 6.15 155337 | 113                   | 11       | 15               |
| 7           | Toposome                                        | AAQ17121.1       | Paracentrotus lividus         | 6.15 155337 | 180                   | 15       | 18               |
| 8           | Toposome                                        | AAQ17121.1       | Paracentrotus lividus         | 6.15 155336 | 184                   | 14       | 17               |
| 9           | nectin precursor                                | CAE17512.2       | Paracentrotus lividus         | 6.02 108817 | 170                   | 20       | 18               |
| 10          | nectin variant 2 precursor                      | ALY05410.1       | Paracentrotus lividus         | 5.95 108911 | 111                   | 14       | 14               |
| 11          | nectin precursor                                | CAE17512.2       | Paracentrotus lividus         | 6.02 108817 | 141                   | 21       | 18               |
| 12          | nectin variant 2 precursor                      | ALY05410.1       | Paracentrotus lividus         | 5.95 108911 | 104                   | 17       | 15               |
| 13          | nectin precursor                                | CAE17512.2       | Paracentrotus lividus         | 6.02 108817 | 170                   | 29       | 21               |
| 14          | nectin variant 2 precursor                      | ALY05410.1       | Paracentrotus lividus         | 5.95 108911 | 120                   | 23       | 17               |
| 15          | nectin precursor                                | CAE17512.2       | Paracentrotus lividus         | 6.02 108817 | 133                   | 21       | 18               |
| 16          | nectin variant 2 precursor                      | ALY05410.1       | Paracentrotus lividus         | 5.95 108911 | 110                   | 20       | 16               |
| 17          | flotillin-1                                     | XP_791741.2      | Strongylocentrotus purpuratus | 7.57 47559  | 122                   | 31       | 12               |
| 18          | Actin, cytoskeletal 2A                          | W4Y1A3           | Strongylocentrotus purpuratus | 5.29 42059  | 112                   | 31       | 10               |
| 19          | actin, cytoskeletal 2B                          | NP_999693.1      | Strongylocentrotus purpuratus | 5.29 42057  | 168                   | 32       | 16               |
| 20          | actin, cytoskeletal 2B                          | NP_999693.1      | Strongylocentrotus purpuratus | 5.29 42057  | 148                   | 51       | 16               |
| 21          | actin, cytoskeletal 2B                          | NP_999693.1      | Strongylocentrotus purpuratus | 5.29 42057  | 148                   | 33       | 13               |
| 22          | actin, cytoskeletal 2B                          | NP_999693.1      | Strongylocentrotus purpuratus | 5.29 42057  | 166                   | 41       | 15               |
| 23          | actin, cytoskeletal 2B                          | NP_999693.1      | Strongylocentrotus purpuratus | 5.29 42057  | 109                   | 35       | 11               |
| 24          | actin, cytoskeletal 2B                          | NP_999693.1      | Strongylocentrotus purpuratus | 5.29 42057  | 143                   | 32       | 14               |
| 25          | actin, cytoskeletal 2B                          | NP_999693.1      | Strongylocentrotus purpuratus | 5.29 42057  | 155                   | 35       | 16               |
| 26          | actin, cytoskeletal 2B                          | NP_999693.1      | Strongylocentrotus purpuratus | 5.29 42057  | 161                   | 41       | 18               |
| 27          | actin, cytoskeletal 2B                          | NP_999693.1      | Strongylocentrotus purpuratus | 5.29 42057  | 144                   | 34       | 15               |
| 28          | actin, cytoskeletal 2B                          | NP_999693.1      | Strongylocentrotus purpuratus | 5.29 42057  | 150                   | 29       | 16               |
| 29          | actin, cytoskeletal 2B                          | NP_999693.1      | Strongylocentrotus purpuratus | 5.29 42057  | 120                   | 33       | 14               |
| 30          | muscle actin isoform X1                         | XP_011661664.1   | Strongylocentrotus purpuratus | 5.30 42077  | 147                   | 38       | 13               |
| 31          | muscle actin isoform X1                         | XP_011661664.1   | Strongylocentrotus purpuratus | 5.30 42077  | 157                   | 46       | 15               |
| 32          | muscle actin isoform X1                         | XP_011661664.1   | Strongylocentrotus purpuratus | 5.30 42077  | 161                   | 42       | 15               |
| 33          | actin-15B                                       | XP_001176242.1   | Strongylocentrotus purpuratus | 5.29 42059  | 158                   | 36       | 14               |
| 34          | actin-15B                                       | XP_001176242.1   | Strongylocentrotus purpuratus | 5.29 42059  | 130                   | 32       | 12               |
| 35          | actin-15B                                       | XP_001176242.1   | Strongylocentrotus purpuratus | 5.29 42059  | 147                   | 36       | 13               |
| 36          | actin-15B                                       | XP_001176242.1   | Strongylocentrotus purpuratus | 5.29 42059  | 130                   | 35       | 13               |
| 37          | actin-15B                                       | XP_001176242.1   | Strongylocentrotus purpuratus | 5.29 42059  | 154                   | 39       | 17               |
| 38          | actin-15B                                       | XP_001176242.1   | Strongylocentrotus purpuratus | 5.29 42059  | 203                   | 40       | 16               |
| 39          | actin-15B                                       | XP_001176242.1   | Strongylocentrotus purpuratus | 5.29 42059  | 121                   | 32       | 14               |
| 40          | actin-15B                                       | XP_001176242.1   | Strongylocentrotus purpuratus | 5.29 42059  | 112                   | 31       | 10               |
| 41          | guanine nucleotide-binding protein subunit beta | XP_001176793.1   | Strongylocentrotus purpuratus | 5.79 38221  | 135                   | 43       | 15               |
| 42          | actin related protein 1                         | NP_999634.1      | Strongylocentrotus purpuratus | 5.29 42146  | 184                   | 33       | 15               |

## References

- 1 D. Wessel and U. I. Flügge, A method for the quantitative recovery of protein in dilute solution in the presence of detergents and lipids, *Anal. Biochem.*, 1984, **138**, 141–143.
- 2 S. Ritz, S. Schöttler, N. Kotman, G. Baier, A. Musyanovych, J. Kuharev, K. Landfester, H. Schild, O. Jahn, S. Tenzer and V. Mailänder, Protein Corona of Nanoparticles: Distinct Proteins Regulate the Cellular Uptake, *Biomacromolecules*, 2015, **16**, 1311–1321.
